# Supplementary material for: Catalytic Polymerization of Phthalonitrile Resins by Carborane with Enhanced Thermal Oxidation Resistance: Experimental and Molecular Simulation
Source: MDPI journal article supplement (doi:10.3390/polym14010219), 2022-01-05
Supplement: s1 [file s1]

**Table S1.** Key bond lengths of transition states (TS<sub>AM</sub> and TS<sub>M</sub>).

| Structure        | Bond length (Å) |      |
|------------------|-----------------|------|
| TS <sub>AM</sub> | C-N             | 1.17 |
|                  | B-N             | 1.68 |
|                  | C-H             | 1.18 |
|                  | B-H             | 1.45 |
| TS <sub>M</sub>  | C-N             | 1.28 |
|                  | B-N             | 2.59 |
|                  | C-H             | 1.90 |
|                  | B-H             | 2.59 |
